# 1 The jasmine (*Jasminum sambac*) genome and 2 flower fragrances

3 Gang Chen<sup>2†</sup>, Salma Mostafa<sup>1†</sup>, Zhaogeng Lu<sup>1†</sup>, Ran Du<sup>3†</sup>, Jiawen Cui<sup>1</sup>, Yun Wang<sup>1</sup>, Qinggang Liao<sup>3</sup>, Jinkai Lu<sup>1</sup>,  
4 Xinyu Mao<sup>1</sup>, Bang Chang<sup>1</sup>, Li Wang<sup>1</sup>, Zhichao Jia<sup>1</sup>, Xiulian Yang<sup>4</sup>, Yingfang Zhu<sup>5</sup>, Jianbin Yan<sup>3\*</sup>, Biao Jin<sup>1\*</sup>

5 <sup>1</sup> College of Horticulture and Plant Protection, Yangzhou University, Yangzhou 225009, China

6 <sup>2</sup> College of Bioscience and Biotechnology, Yangzhou University, Yangzhou 225009, China

7 <sup>3</sup> Shenzhen Branch, Guangdong Laboratory for Lingnan Modern Agriculture, Genome Analysis Laboratory of the  
8 Ministry of Agriculture, Agricultural Genomics Institute at Shenzhen, Chinese Academy of Agricultural Sciences,  
9 Shenzhen 518120, China

10 <sup>4</sup> College of Landscape Architecture, Nanjing Forestry University, Nanjing 210037, China

11 <sup>5</sup> Institute of Plant Stree Biology, State Key Laboratory of Cotton Biology, Department of Biology, Henan  
12 University, Kaifeng 475001, China

13

14 Gang Chen: [chengang@yzu.edu.cn](mailto:chengang@yzu.edu.cn); Salma Mostafa: [salma-mostafa89@outlook.com](mailto:salma-mostafa89@outlook.com); Zhaogeng Lu:  
15 [d160068@yzu.edu.cn](mailto:d160068@yzu.edu.cn); Ran Du: [duran@caas.cn](mailto:duran@caas.cn); Jiawen Cui: [dx120180104@yzu.edu.cn](mailto:dx120180104@yzu.edu.cn); Yun Wang:  
16 [mz120190969@yzu.edu.cn](mailto:mz120190969@yzu.edu.cn); Qinggang Liao: [liaoqinggang@caas.cn](mailto:liaoqinggang@caas.cn); Jinkai Lu: [dx120200123@yzu.edu.cn](mailto:dx120200123@yzu.edu.cn); Xinyu  
17 Mao: [mz120180955@yzu.edu.cn](mailto:mz120180955@yzu.edu.cn); Bang Chang: [mx120180603@yzu.edu.cn](mailto:mx120180603@yzu.edu.cn); Li Wang: [liwang@yzu.edu.cn](mailto:liwang@yzu.edu.cn);  
18 Zhichao Jia: [jjazhichao95@163.com](mailto:jjazhichao95@163.com); Xiulian Yang: [xly@njfu.com.cn](mailto:xly@njfu.com.cn); Yingfang Zhu: [zhuyf@henu.edu.cn](mailto:zhuyf@henu.edu.cn)

19

20 Corresponding Author:

21 [bjin@yzu.edu.cn](mailto:bjin@yzu.edu.cn) orcid: 0000-0002-7330-334X

22 [jianbinlab@caas.cn](mailto:jianbinlab@caas.cn) orcid: 0000-0001-7934-8808

23

24

25

26

## 27 **Abstract**

28 *Jasminum sambac*, a world-renowned plant appreciated for its exceptional flower fragrance, is of  
29 cultural and economic importance. However, the genetic basis of its fragrance is largely unknown.  
30 Here, we present the first *de novo* genome of *J. sambac* with 550.12 Mb (scaffold N50 = 40.1 Mb)  
31 assembled into 13 pseudochromosomes. Terpene synthase genes associated with flower fragrance  
32 are significantly amplified in the form of gene clusters through tandem duplications in the genome.  
33 Eleven homolog genes within the SABATH super-family were identified as related to  
34 phenylpropanoid/benzenoid compounds. Several key genes regulating jasmonate biosynthesis  
35 were duplicated causing increased copy numbers. Furthermore, multi-omics analyses identified  
36 various aromatic compounds and the key genes involved in fragrance biosynthesis pathways. Our  
37 genome of *J. sambac* offers a basic genetic resource for studying floral scent biosynthesis and  
38 provides an essential foundation for functional genomic research and variety improvements in  
39 *Jasminum*.

40

## 41 **Introduction**

42 *Jasminum sambac* (common names: Arabian jasmine, Sambac jasmine, jasmine flower,  
43 茉莉花 Mo-Li-Hua) is famous worldwide as a fragrant plant with sweet-scented flowers. The  
44 fragrant flowers of *J. sambac* are used for the extraction of jasmine essential oil, which is a  
45 common natural ingredient in the perfume and cosmetic industries, as well as in pharmaceutical  
46 applications and aromatherapy<sup>1,2</sup>. *J. sambac* flowers are also used in the manufacture of jasmine  
47 tea consumed popularly in East Asia<sup>3,4</sup>. Various food products with the sweet flavor of *J. sambac*  
48 flowers have been produced, such as syrup, aerated water, jam, yogurt, ice cream, wine, etc. In  
49 some Asian countries, *J. sambac* is regarded as auspicious symbols in religious ceremonies or  
50 used to make garlands for welcoming guests<sup>5</sup> and it has been integrated into local cultures and  
51 traditions<sup>6,7</sup>.

52 Flower fragrances are volatile organic compounds (VOCs) emitted by flowering plants to  
53 attract pollinators and ensure reproductive success<sup>8</sup>. Flower fragrances also attract humans and  
54 have become the focus of intensive use in the floriculture and fragrance industries. Different  
55 flowering plant species have distinct flower fragrances, depending on differences in the

56 composition, amount, and emission of floral VOCs<sup>8,9</sup>. The VOCs of *J. sambac* floral scents belong  
57 mainly to the terpenoid and phenylpropanoid/benzenoid classes<sup>10</sup>. However, most previous  
58 analyses of VOCs from *J. sambac* flowers were based on harvested flowers<sup>11-13</sup>, whereas the  
59 fragrances actively released by flowers growing in a natural state remain obscure. Some genes  
60 involved in the biosynthetic pathways of *J. sambac* floral scent compounds have been isolated and  
61 analyzed, such as genes responsible for the biosynthesis of  $\alpha$ -farnesene (*JsHMGS*, *JsHMGR*,  
62 *JsFPPS*, and *JsTPS*) in the mevalonic acid (MVA) pathway<sup>14</sup>. However, the biosynthesis pathways  
63 of floral scent compounds and their regulatory networks are complex and their underlying genetic  
64 mechanisms remain largely unknown. Whole-genome sequencing is a practical strategy for  
65 identifying the metabolic pathways of natural-compound biosynthesis in plants<sup>15-17</sup>. Although *J.*  
66 *sambac* flower products are widely used and its flower scents are economically valuable, the lack  
67 of *J. sambac* genome data seriously hampers progress in unraveling its fragrance biosynthesis and  
68 metabolism. Additionally, jasmonates are important aromatic substances in *Jasminum* flowers.  
69 Jasmonates have been extensively studied in biotic and abiotic stress responses and defenses in  
70 model plants, crops, and other plants<sup>18</sup>. Nevertheless, research on jasmonate biosynthesis and  
71 regulation in *Jasminum* is also impeded by the absence of genome sequence data.

72 Here, we report a chromosome-level genome assembly of *J. sambac* obtained using a  
73 combination of Illumina and PacBio data, enhanced by information from Hi-C technologies.  
74 Furthermore, by combining multi-omics analyses of different stages of flowers, we identified  
75 various aromatic compounds released from both harvested and naturally grown flowers. Several  
76 important genes involved in the biosynthetic pathways of major fragrant compounds in jasmine  
77 flowers were identified. This *J. sambac* genome sequence and the identified floral scent volatiles  
78 offer valuable resources for *J. sambac* genetic research and will lay a foundation for biological  
79 and agronomic research on this commercially and culturally important species.

## 80 **Results**

### 81 **Genome sequencing and assembly**

82 K-mer analysis of parallel next-generation sequencing short-read data revealed that the *J.*  
83 *sambac* genome size is ~573.02 Mb with a heterozygosity rate of 0.99% and a repeat rate of 57.12%  
84 (Supplementary Fig. S1), indicating the complexity of the *J. sambac* genome. The genome was

85 sequenced and assembled using a combination of single-molecule real-time (SMRT) sequencing  
86 technology from PacBio and Hi-C. In total, 63.82 Gb of data (116× the assembled genome) were  
87 generated from 4.5 M PacBio single-molecule long reads (average read length = 14.2 kb, longest  
88 read length = 127.0 kb). In addition, using DNA from the leaves of *J. sambac*, we generated 61.6  
89 Gb of Illumina paired-end reads (~112×). PacBio long reads were assembled using the  
90 overlap-layout-consensus method with different assemblers. Finally, *de novo* assembly yielded  
91 373 contigs with a contig N50 length of 2.50 Mb. The total assembly size was 550.12 Mb, with a  
92 GC content of 34.62%, covering 96% of the estimated *J. sambac* genome size (Table 1).

93 Table 1 Statistics of the *J. sambac* genome and gene annotation

| <b>Genome assembly</b>         |            |
|--------------------------------|------------|
| Estimated genome size          | 573.02 Mb  |
| GC content                     | 34.62%     |
| Contig N50 length              | 2.50 Mb    |
| Longest contig                 | 7.64 Mb    |
| Assembled genome size          | 550.12 Mb  |
| Scaffold N50 length            | 40.10 Mb   |
| Longest scaffold               | 52.97 Mb   |
| <b>Gene annotation</b>         |            |
| Repeat region                  | 47.22%     |
| Number of protein coding genes | 30,129     |
| Average transcript length      | 3335.86 bp |
| Average coding sequence length | 1103.73 bp |
| Average exons per gene         | 4.87       |
| Average exon length            | 226.57 bp  |
| Average intron length          | 576.58 bp  |

94

95 To refine the *J. sambac* assembly, Hi-C libraries were constructed and sequenced. The Hi-C  
96 read pairs were mapped onto the draft assembly and used to improve the scaffold N50 to 40.1 Mb  
97 and the contig number to 383, with the longest scaffold being 53.0 Mb and the scaffold number

98 being 112 (Table 1, Supplementary Table S1). The final reference assembly comprised 13  
99 chromosome-scale pseudomolecules (the pseudomolecules are hereafter referred to as  
100 chromosomes) (Fig. 1), with maximum and minimum lengths of 53.0 Mb and 33.5 Mb,  
101 respectively (Supplementary Table S2). The total length of the chromosomes accounts for 97.36%  
102 (535.57 Mb) of the assembled genome size of 550.12 M.  
103

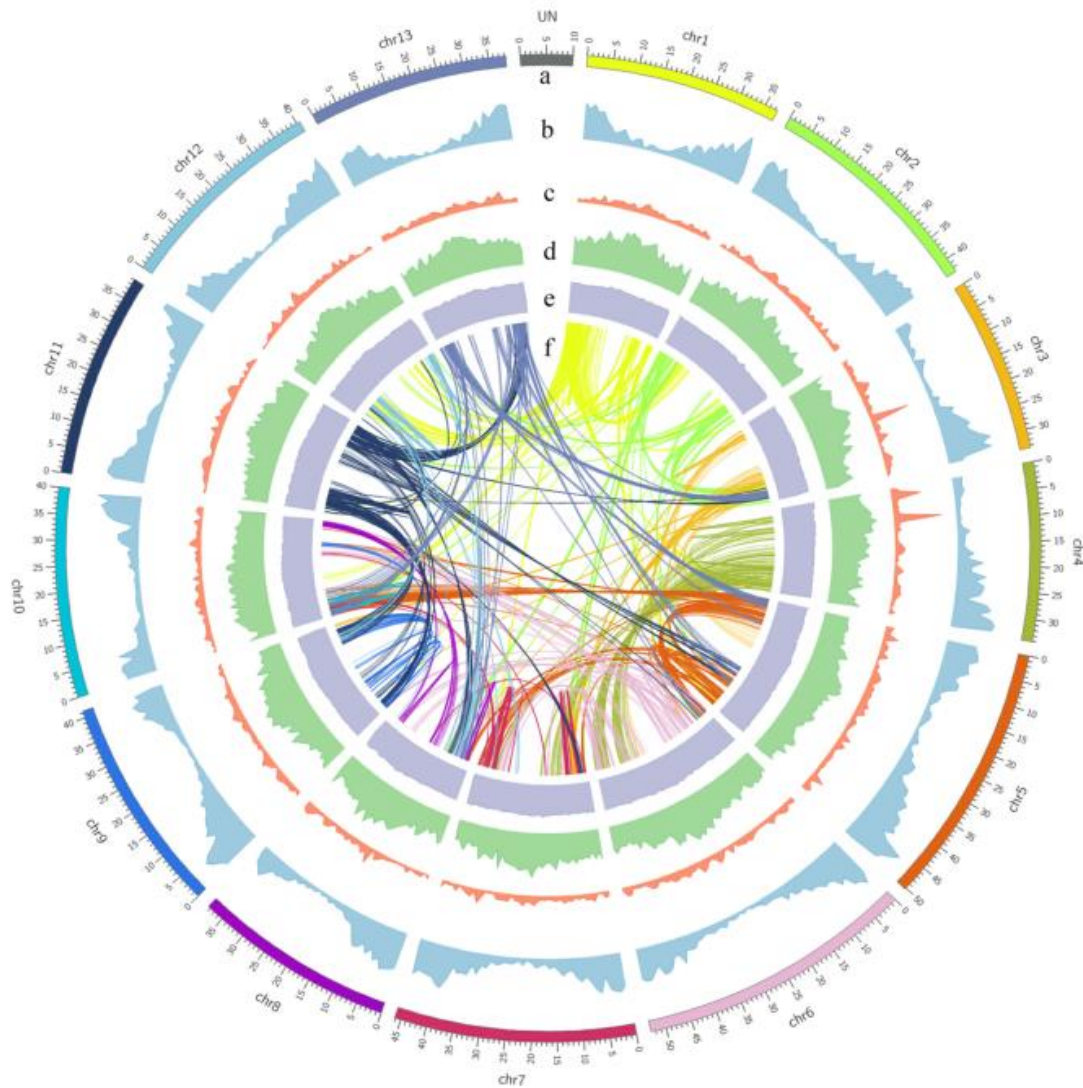

104

105

106 **Fig. 1 Genomic features of *J. sambac*.** a Circular representation of the 13 pseudochromosomes. b Gene density. c  
107 Density of non-coding RNA. d Distribution of transposable elements (TEs). e GC content distribution. f Syntenic  
108 relationships among duplication blocks containing more than 13 paralogous gene pairs.

109 To evaluate the quality of the assembled genome, the Benchmarking Universal Single-Copy  
110 Orthologs (BUSCO)<sup>19</sup> assessment was conducted and the results revealed a high-quality draft

111 genome covering 1320 (91.7%, Supplementary Table S3) complete single-copy orthologs of the  
112 1440 plant-specific sequences (Embryophyta data set from BUSCO datasets). Furthermore, a Hi-C  
113 interaction heatmap separated distinct regions on different chromosomes, indicating that all bins  
114 were allocated to 13 chromosomes (Supplementary Fig. S2). These results demonstrated that the  
115 assembled *J. sambac* genome is of high quality at the chromosome level.

## 116 **Genome annotation and gene prediction**

117 We identified a total of 259.8 Mb of repetitive sequences in the genome of *J. sambac*, which  
118 accounted for 47.22% of the assembled genome. Among them, transposable elements (TEs) were  
119 the predominant components (45.56% of the genome) and long terminal repeat (LTR)  
120 retrotransposons comprised 33.97% of the assembled genome (Supplementary Table S4). Within  
121 the LTR family, the *copia* subfamily was the most abundant, accounting for 16.2% of the genome,  
122 followed by the *gypsy* subfamily (15.0%). Additionally, the distribution of TEs varied across the  
123 genome (Fig. 1d, Supplementary Fig. S3); for example, the TE content was higher near the  
124 centromeres compared to other parts of the chromosomes.

125 We annotated the remaining repeat-masked *J. sambac* genome using a comprehensive strategy  
126 of *de novo* prediction combined with homology-based and transcriptome-based protein predictions.  
127 In total, 30,129 complete genes were predicted, with an average transcript length of 3336 bp and  
128 an average coding sequence length of 1104 bp (Table 1, Supplementary Tables S4, S5, S6).  
129 Among the predicted genes, 67.5% (20,345 of 30,129) were predicted by all three strategies  
130 (Supplementary Fig. S5). Additionally, most genes were distributed near the two ends of the  
131 chromosomal arms (Fig. 1b).

132 In total, 9902 non-coding RNAs, including 1657 microRNAs (miRNAs), 1767 ribosomal  
133 RNAs (rRNAs), and 535 transfer RNAs (tRNAs), were identified (Supplementary Table S7).  
134 Further functional annotation revealed that 93.20% of all predicted genes could be annotated with  
135 the following protein-related databases: RefSeq non-redundant database (NR) (92.80%),  
136 Swiss-Prot (74.20%), Kyoto Encyclopedia of Genes and Genomes (KEGG) (69.60%), InterPro  
137 (78.00%), Gene Ontology (GO) (53.80%), and Pfam (73.00%). In total, 18,911 genes were  
138 commonly annotated in the Swiss-Prot, InterPro, NR, and KEGG databases (Supplementary Table  
139 S8, Supplementary Fig. S6).

140

## 141 **Genome evolution of *J. sambac***

142 The evolutionary dynamics of gene families were analyzed by comparing the *J. sambac* genome  
143 with those of 16 representative plant species. In total, 42,577 gene families were clustered among  
144 all 17 species, and 6337 gene families were in common, including 3670 single-copy orthologs (Fig.  
145 2d). From the gene families clustered in five species of the Oleaceae family (*J. sambac*,  
146 *Osmanthus fragrans*, *Fraxinus excelsior*, *Olea europaea*, and *Olea oleaster*), 15,160 gene families  
147 were identified in the *J. sambac* genome, of which 800 gene families (2060 genes) were *J.*  
148 *sambac*-specific while 12,037 gene families were shared among all five species in the family (Fig.  
149 2a). Functional enrichment analysis of the *J. sambac*-specific gene families indicated that these  
150 gene families are mainly involved in terpenoid backbone biosynthesis, monoterpene  
151 biosynthesis, and protein processing in the endoplasmic reticulum (Supplementary Fig. S7), which  
152 are likely important for volatile compound biosynthesis in *J. sambac* flowers<sup>10</sup>. A phylogenetic  
153 tree was constructed from single-copy gene families of *J. sambac* and the 16 representative  
154 plant species (Fig. 2c). The results revealed that the Oleaceae and Labiatae split ~78.5 million  
155 years ago (Mya), whereas *J. sambac* diverged ~48.8 Mya from the common ancestor of the  
156 five species within the Oleaceae family. Among the Oleaceae, *J. sambac* diverged earlier than  
157 the other four species. In addition, we found 16 expanded gene families and 8 contracted gene  
158 families in *J. sambac* compared to the common ancestor of Oleaceae and Labiatae (Fig. 2b).  
159 The expanded gene families were involved mainly in riboflavin metabolism and butanoate  
160 metabolism (both related to fragrant volatiles). One contracted gene family was related to  
161 plant–pathogen interactions. We applied a four-fold synonymous third-codon transversion  
162 (4DTV) estimation to detect whole-genome duplication (WGD) events. The results revealed  
163 that one WGD event might have occurred in the common ancestor of *J. sambac* and *O.*  
164 *fragrans* before their divergence (Fig. 2e).



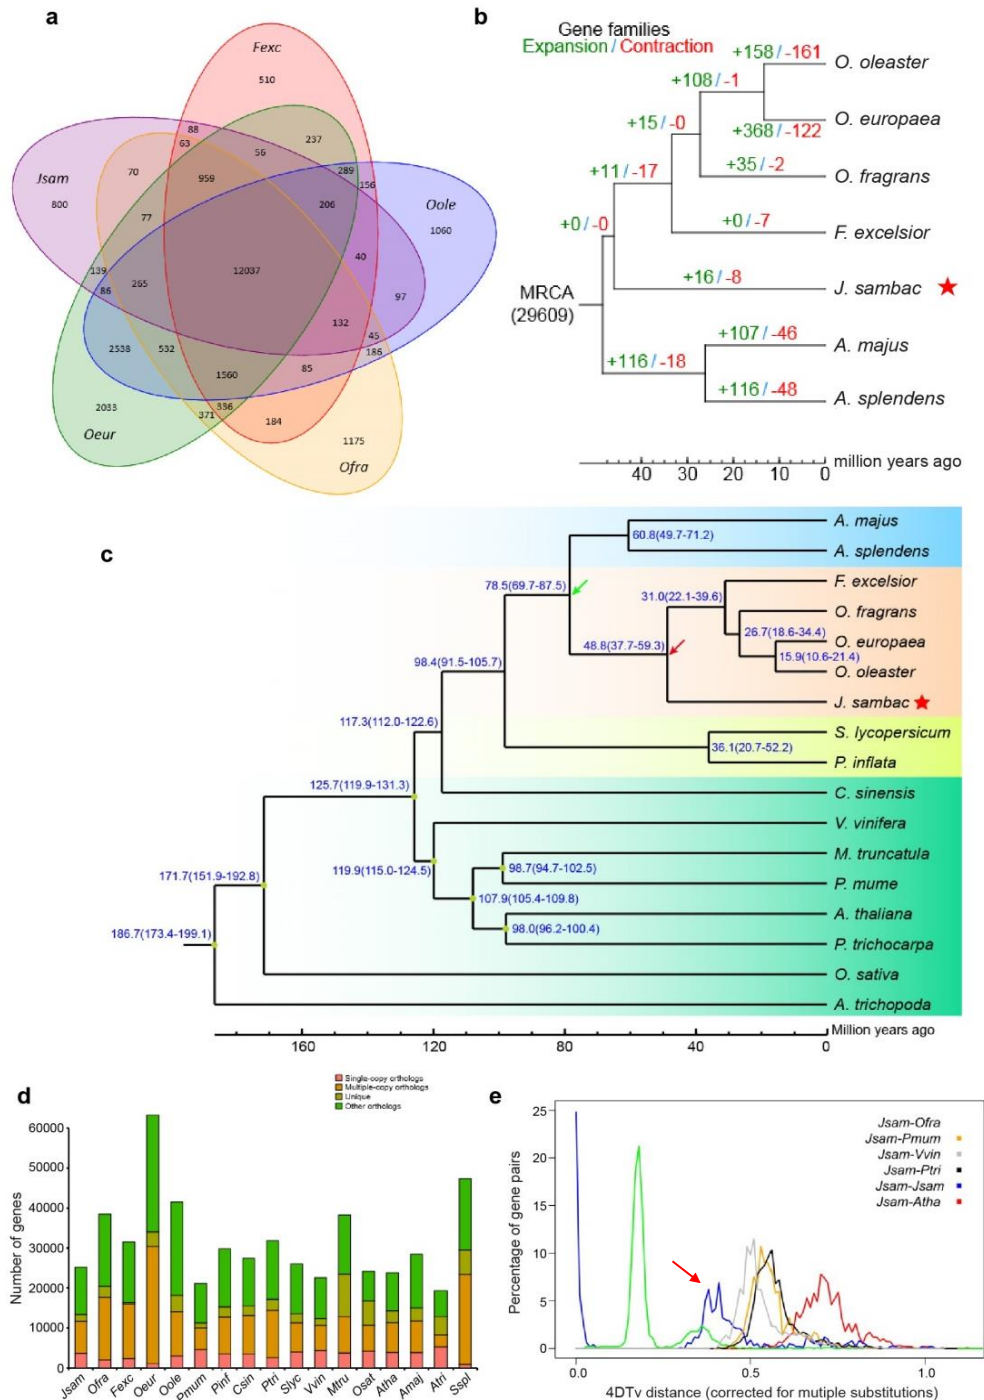

165

166 **Fig. 2 Comparative genomic analysis of *J. sambac* and other species.** **a** Venn diagram of the shared orthologous  
 167 gene families in *J. sambac*, *F. excelsior*, *O. fragrans*, *O. europaea*, and *O. oleaster*. The number of gene families is  
 168 listed for each component. **b** Expansion and contraction in gene families. The numeric value beside each node  
 169 shows the number of expanded (green) and contracted (red) gene families. **c** Phylogenetic tree constructed from  
 170 single-copy gene families of *J. sambac* and 16 representative plant species. The blue numbers beside each node  
 171 indicate the divergence time of each species. **d** Distribution of genes in *J. sambac* and 16 representative plant  
 172 species. Only the longest isoform for each gene was used. Gene clusters (families) were identified using the  
 173 OrthoMCL package with default parameters. **e** Distribution of 4DTv distance between syntenic orthologous genes.



174 The abscissa represents the 4DTv value; the ordinate represents the proportion of genes corresponding to the 4DTv  
175 values. The red arrow indicates a WGD event that occurred before the divergence of *J. sambac* and *O. fragrans*.

## 176 **The terpene synthase (TPS) gene family and terpene biosynthesis in *J. sambac***

177 The TPS family is a vital enzyme gene family for terpene biosynthesis, which is crucial in the  
178 production of floral VOCs. We identified 59 TPS genes in *J. sambac* containing at least one  
179 conserved domain, and most of the TPS genes (47 of 59) contained two conserved domains  
180 (Supplementary Table S9). We further constructed an evolutionary tree of the 47 TPS genes  
181 containing two conserved domains and found that the TPS genes of *J. sambac* could be classified  
182 into five subgroups: TPS-a, TPS-b, TPS-c, TPS-e/f, and TPS-g. TPS-a was the largest subgroup,  
183 accounting for 53.2% of the total TPS genes (Fig. 3a). Furthermore, most of the TPS genes were  
184 highly expressed in leaves and flowers in *J. sambac*. The number of *J. sambac* TPS genes  
185 containing two conserved domains is significantly higher compared to *Arabidopsis thaliana* (33),  
186 *Camellia sinensis* (30), *Solanum lycopersicum* (33), *O. fragrans* (40) (Fig. 3b), cacao (36), and  
187 kiwifruit (34). Almost half of the *J. sambac* TPS genes (23 of 47) contained tandem repeats, and  
188 these genes formed TPS gene clusters on chromosomes 2, 3, 4, 6, and 11 (Fig. 3c, red gene IDs).  
189 These genes underwent recent tandem duplication events, rather than a WGD event, resulting in  
190 the amplification of TPS genes in the *J. sambac* genome (Fig. 3d). Through phylogenetic analysis of  
191 the TPS genes, we further identified 17 gene pairs, 11 of which had a synonymous substitution  
192 rate ( $K_s$ ) < 0.2 (Fig. 3e), implying that a negative selection occurred in these conservative TPS  
193 genes. Notably, we also found several events of 4:1 or 2:1 double replication of TPS genes  
194 between *J. sambac* and the tomato genome (Supplementary Fig. S8b), indicating the expansion of  
195 the TPS family of *J. sambac* (Oleaceae) relative to tomato (Solanaceae). In addition, the  
196 expression of most TPS genes was higher in flowers than in leaves (Fig. 3a), indicating that the  
197 TPS genes in *J. sambac* are functionally important in flowers. Furthermore, the differentially  
198 expressed genes between the full-bloom flowers (FFs) and flower buds (FBs) were enriched in  
199 several categories: terpenoid backbone biosynthesis, ubiquinone and other terpenoid-quinone  
200 biosynthesis, fatty acid metabolism, and flavonoid biosynthesis (Supplementary Fig. S8a, arrows).  
201 The mean expression of TPS genes was higher in FBs than in FFs (Fig. 3f), indicating that these  
202 genes are actively expressed at the bud stage, preparing for the release of floral fragrance  
203 substances at the full-bloom stage.

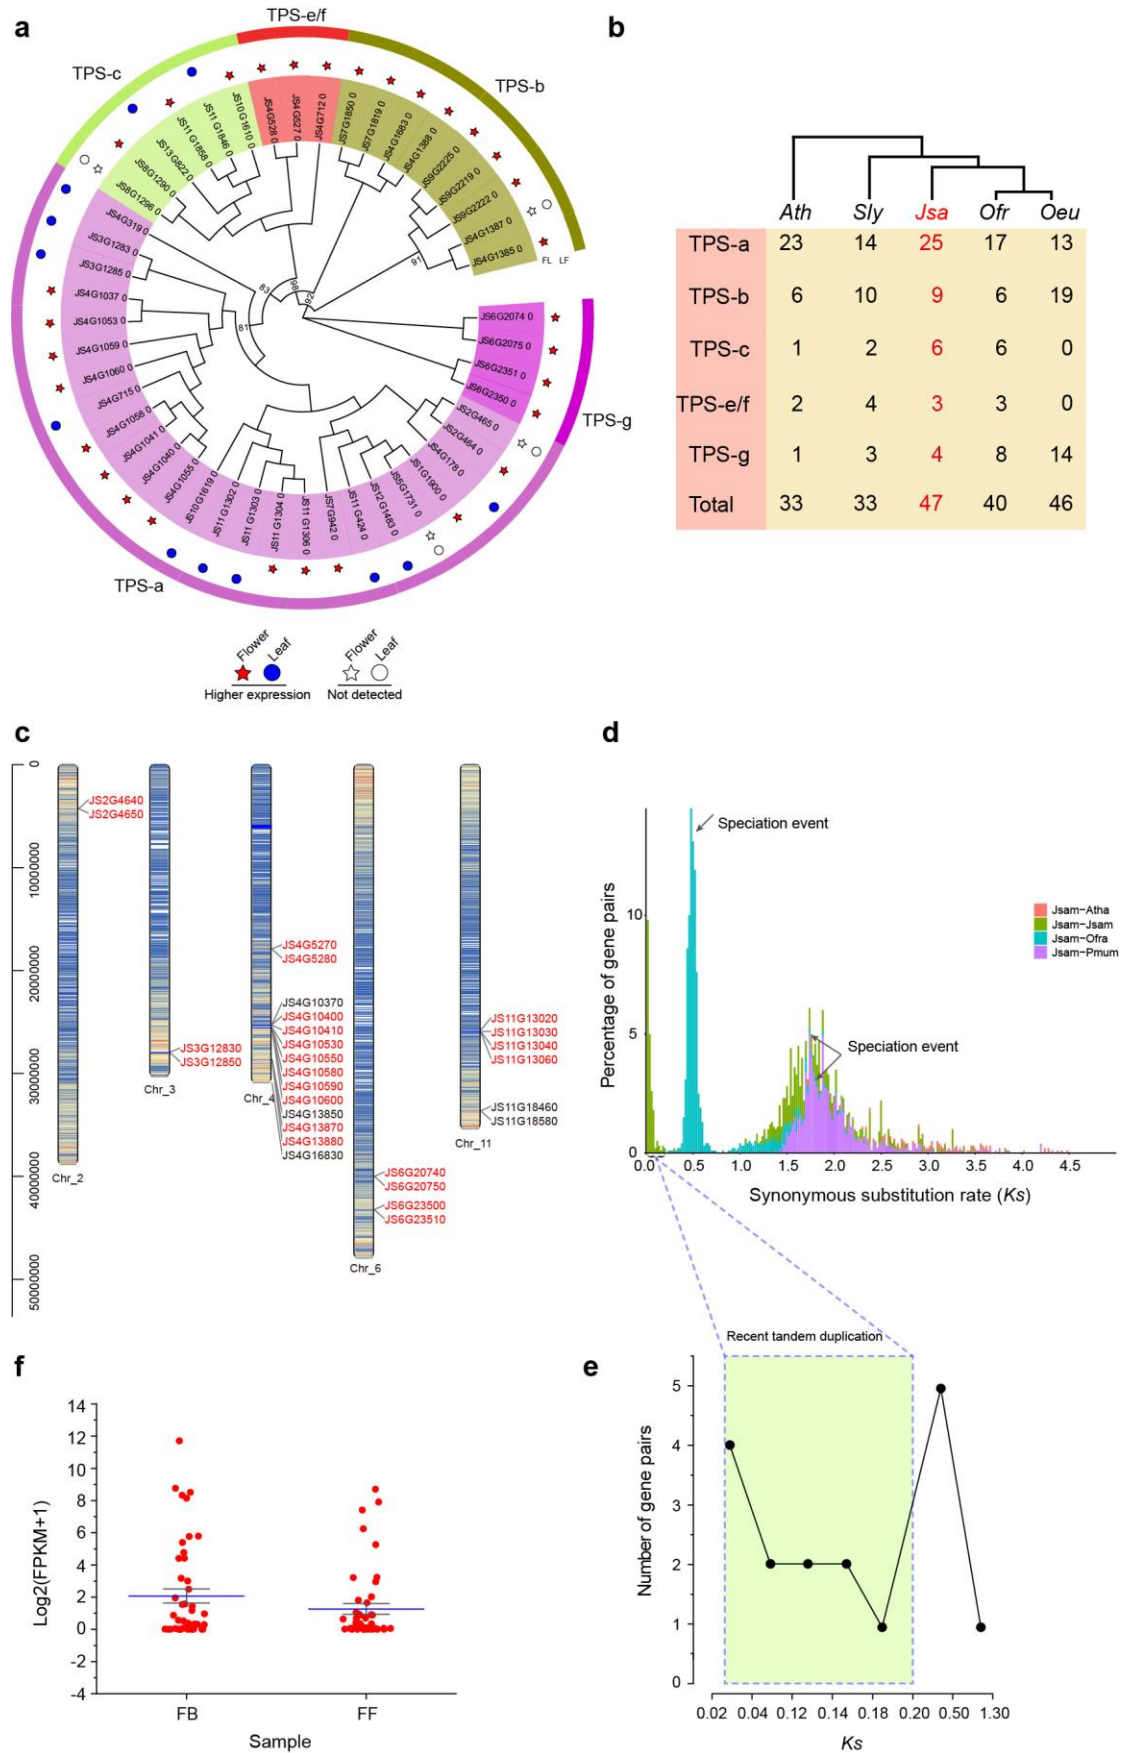

204

205

**Fig. 3** TPS gene family in the genome of *J. sambac*. **a** Evolutionary tree of the 47 TPS genes containing two

206 conserved domains identified in the *J. sambac* genome. Colored stars and circles indicate the TPS genes highly  
207 expressed in flowers and leaves, respectively. **b** The numbers of TPS genes containing two conserved domains in *J.*  
208 *sambac*, *A. thaliana*, *S. lycopersicum*, and *O. fragrans*, and *O. europaea*. **c** Chromosomal distribution of the *J.*  
209 *sambac* TPS genes. The colored lines in different chromosomes indicate the gene density; darker lines indicate  
210 higher gene density. Red gene names indicate TPS genes that formed gene clusters on chromosomes. **d** No WGD  
211 event was identified in the amplification of TPS genes in the *J. sambac* genome. **e** *Ks* distribution of the TPS genes  
212 in the *J. sambac* genome. The TPS gene pairs in the box had *Ks* values < 0.2. **f** Expression levels of TPS genes in  
213 flower buds (FB) and full-bloom flowers (FF) of *J. sambac*. Blue bars indicate mean expression levels.

214

215 The terpene biosynthesis pathway is another important floral-fragrance pathway. We therefore  
216 examined the terpene biosynthesis pathways and confirmed that large numbers of TPS genes were  
217 involved in the synthesis of terpenes in both the MVA and methylerythritol phosphate (MEP)  
218 pathways (Fig. 4). Transcriptional analysis revealed that most of the terpene biosynthesis genes  
219 were more highly expressed in FBs, such as *HMGR*, *HDS*, and *TPS* genes. More importantly,  
220 some *TPS* genes regulating synthesis of germacrene (sesquiterpene), geraniol (monoterpene), and  
221 alpha-terpineol (monoterpene) were also expressed more highly in FBs than in FFs. These  
222 products contribute significantly to floral fragrance. However, three genes encoding TPSs  
223 (*JS6G23500*, *JS4G13880*, and *JS4G16830*) responsible for  $\alpha$ -farnesene and linalool synthesis  
224 were highly expressed in FFs, and metabonomic analysis further revealed that  $\alpha$ -farnesene and  
225 linalool contents were higher in FFs (Supplementary Tables S10, S11, S12). In addition, several  
226 other sesquiterpenes (such as isodene and cis-caryophyllene) and diterpenes (muurolene) were  
227 also detected, all of which had higher levels in FFs (Fig. 4).

228

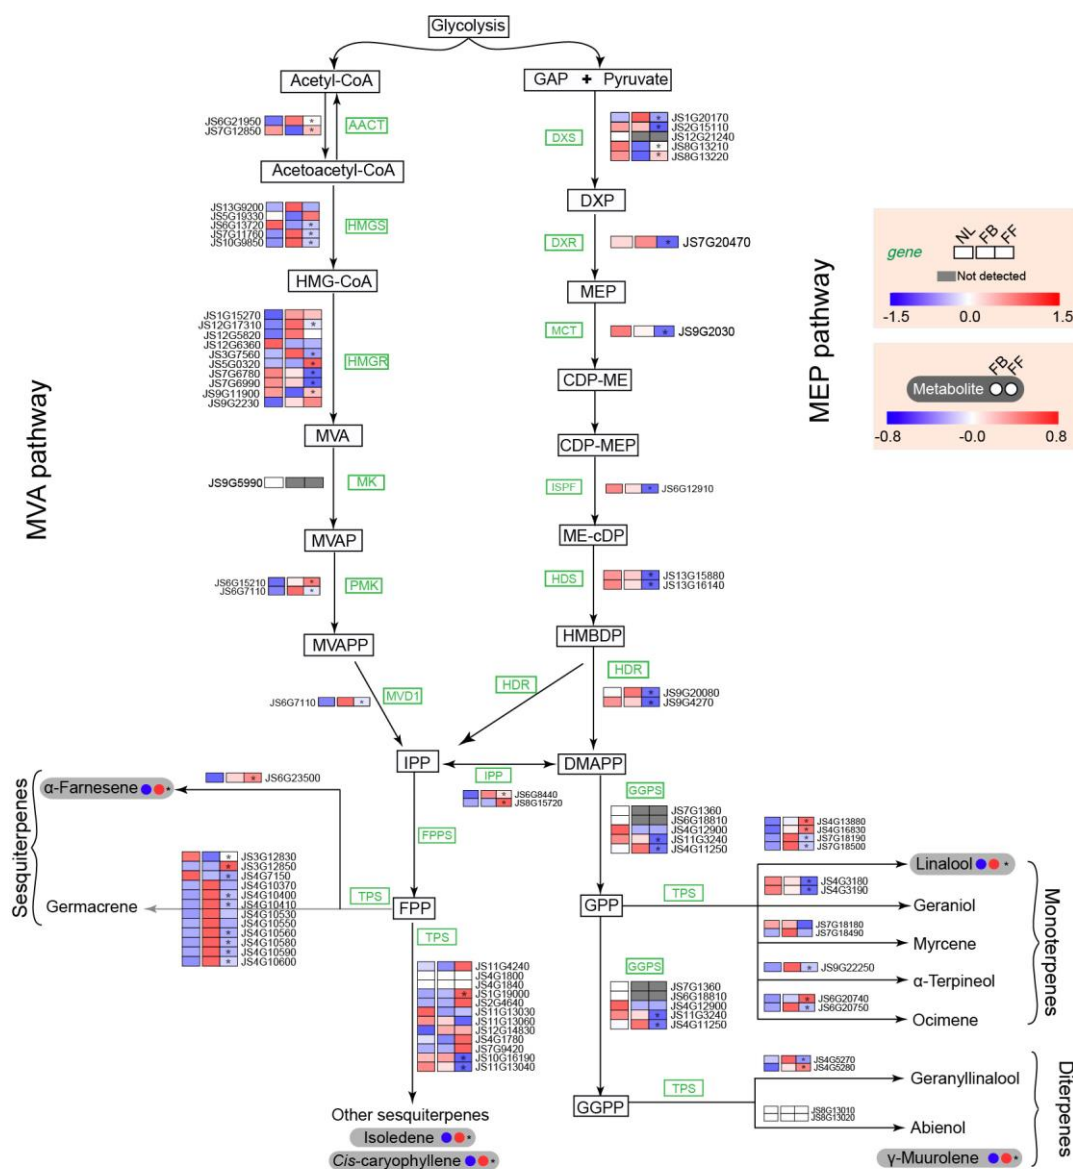

229

230 **Fig. 4 Terpene synthesis pathways in *J. sambac* leaves and flowers based on transcriptomic and metabolomic**  
 231 **analyses.** Heatmap columns indicate expression levels of genes involved in terpene synthesis pathways. Circles to  
 232 the right of metabolites highlighted in grey indicate the different metabolite contents of flower buds (left) and  
 233 full-bloom flowers (right). Asterisks indicate marked differences between the flower buds and full-bloom flowers.  
 234 NL, normal leaves; FB, flower buds; FF, full-bloom flowers.

### 235 **Phenylpropanoid/benzenoid biosynthesis in *J. sambac***

236 Phenylpropanoids and benzenoids represent the second largest class of flower VOCs<sup>20</sup> and  
 237 are exclusively derived from the aromatic amino acid phenylalanine (Phe) (Fig. 5a). Our  
 238 metabolomic and transcriptomic analyses identified many genes and metabolites involved in the  
 239 phenylpropanoid/benzenoid pathways. The expression levels of the gene encoding  
 240 phenylalanine ammonia-lyase (PAL), the first committed enzyme in phenylpropanoid/benzenoid

241 pathways, was higher in FFs than in FBs. Moreover, the expression levels of other genes,  
242 including *AAAT*, *EGS*, *IGS*, and *SAMT*, were also higher in FFs, while those of some genes in  
243 phenylpropanoid/benzenoid pathways (such as *BPBT*) were lower in FFs (Fig. 5a). The production  
244 of phenylpropanoid/benzenoid compounds in plants is related to the SABATH and BAHD  
245 acyltransferase super-families. In our analyses, 11 SABATH homologs were identified, belonging  
246 to the IAMT (3), SAMT (2), JMT (1), SAMT/BSMT (1), and FAMT-like (4) subfamilies (Fig. 5b).  
247 Transcriptomic analysis revealed that expression of FAMT-like genes was higher in FBs than in  
248 FFs, while *JMT* and *SAMT* genes were more highly expressed in FFs, and *IAMT* genes were  
249 expressed at low levels at both stages (Fig. 5c). In addition, COMT and ICMT, belonging to the  
250 SAM-binding methyltransferase superfamily, are involved in aromatic compound metabolism.  
251 Our analysis revealed that expression of *COMT* genes was higher in FFs, while that of *ICMT*  
252 genes was higher in FBs (Fig. 5c). BAHD acyltransferases are responsible for the synthesis of a  
253 myriad flavors and fragrances in plants. In our analysis, expression of most of the genes in the  
254 BAHD family was higher in FBs (Fig. 5d). However, expression of most genes in the  
255 phenylpropanoid/benzenoid pathways was low in leaves (Fig. 5a, c, d), indicating more active  
256 phenylpropanoid/benzenoid biosynthesis in flowers than in leaves. In addition, our metabolomic  
257 analysis revealed that a majority of the detected metabolites, including PhEth, PhA, Eug, benzyl  
258 benzoate (BB), benzyl alcohol (BAIc), benzyl acetate (BAC), BAId, MB, and methyl salicylate  
259 (MeSA), accumulated markedly in FFs, whereas salicylic acid (SA) was higher in FBs (Fig. 5a).  
260







## 269 **Jasmonate biosynthesis genes**

270 Based on comparisons with the genomes of *A. thaliana*, tomato, *Antirrhinum majus*, and *O.*  
271 *europaea*, no expansion of the jasmonic acid (JA) biosynthesis genes was found in the *J. sambac*  
272 genome. However, the number of genes was significantly higher compared to *A. thaliana* (Fig. 6a).  
273 Several key genes in the regulation of JA biosynthesis, including *OPR*, *OPCL*, *AOS*, and *KAT*,  
274 were present at a ratio of 2:1 relative to their presence in the tomato genome, indicating  
275 duplication of these genes in *J. sambac* resulting from the Oleaceae-specific WGD event (Fig. 6b).  
276 Transcriptomic analysis revealed that the expression levels of JA biosynthesis genes in FBs and  
277 FFs were quite different. The expression levels of genes in the JA biosynthesis pathway, especially  
278 *AOS*, *AOC*, *MFP*, and *KAT*, were much higher in FBs than in FFs, while those of  $\beta$ -oxidation  
279 genes such as *OPR*, *OPCL*, and *ACX* were higher in FFs (Fig. 6c, e). In the signaling pathway, the  
280 expression levels of *JS11G18210* and *JS11G18220* were higher in FBs than in FFs, while those of  
281 *JS7G16870*, *JS10G13760*, *JS10G200*, *JS5G30430*, and *JS4G4500* were higher in FFs (Fig. 6c). In  
282 addition, metabolomic and liquid chromatography-mass spectrometry (LC-MS) analyses both  
283 showed that jasmonates were enriched in FFs and FBs. The contents of JA, methyl jasmonate  
284 (MeJA), and jasmonic acid-isoleucine (JA-Ile), as well as those of their precursor ( $\alpha$ -linolenic acid)  
285 and intermediate metabolite (12-oxo-phytodienoic acid, OPDA), were higher in FFs than in FBs  
286 (Fig. 6c, d, Supplementary Table S13). Moreover, LC-MS analysis also revealed that JA and  
287 JA-Ile contents were significantly higher in leaves at 20 min to 2 h after wounding (Fig. 6d).  
288 Interestingly, some genes with high expression in flowers had low expression in leaves, but these  
289 genes were significantly highly expressed in wounded leaves (Fig. 6c, e). Specifically, the mean  
290 expression levels of JA synthesis-related genes (*AOS*, *ACXI*, *KAT*) were higher in wounded leaves  
291 than in normal leaves, especially at 1–2 h after wounding, and JA signal-transduction-related  
292 genes (*JAZ*, *MYC2*) were activated at 20 min to 1 h after wounding (Fig. 6e). Quantitative  
293 reverse-transcription polymerase chain reaction (qRT-PCR) analysis also demonstrated that the  
294 expression of JA synthesis-related genes (*AOC*, *AOS*, *OPR*) and JA signal-transduction-related  
295 genes (*JAZ*, *MYC2*) significantly increased in leaves at 1–2 h after wounding, and then decreased  
296 (Fig. 6f). Of note, the expression levels of *JS5G30430* (one of the *JAZs*) were low in both normal  
297 leaves and wounded leaves. However, it was highly expressed in FFs, indicating that *JS5G30430*

298 mainly responds to endogenous signals during flower development rather than participating in the  
 299 JA-mediated injury response.

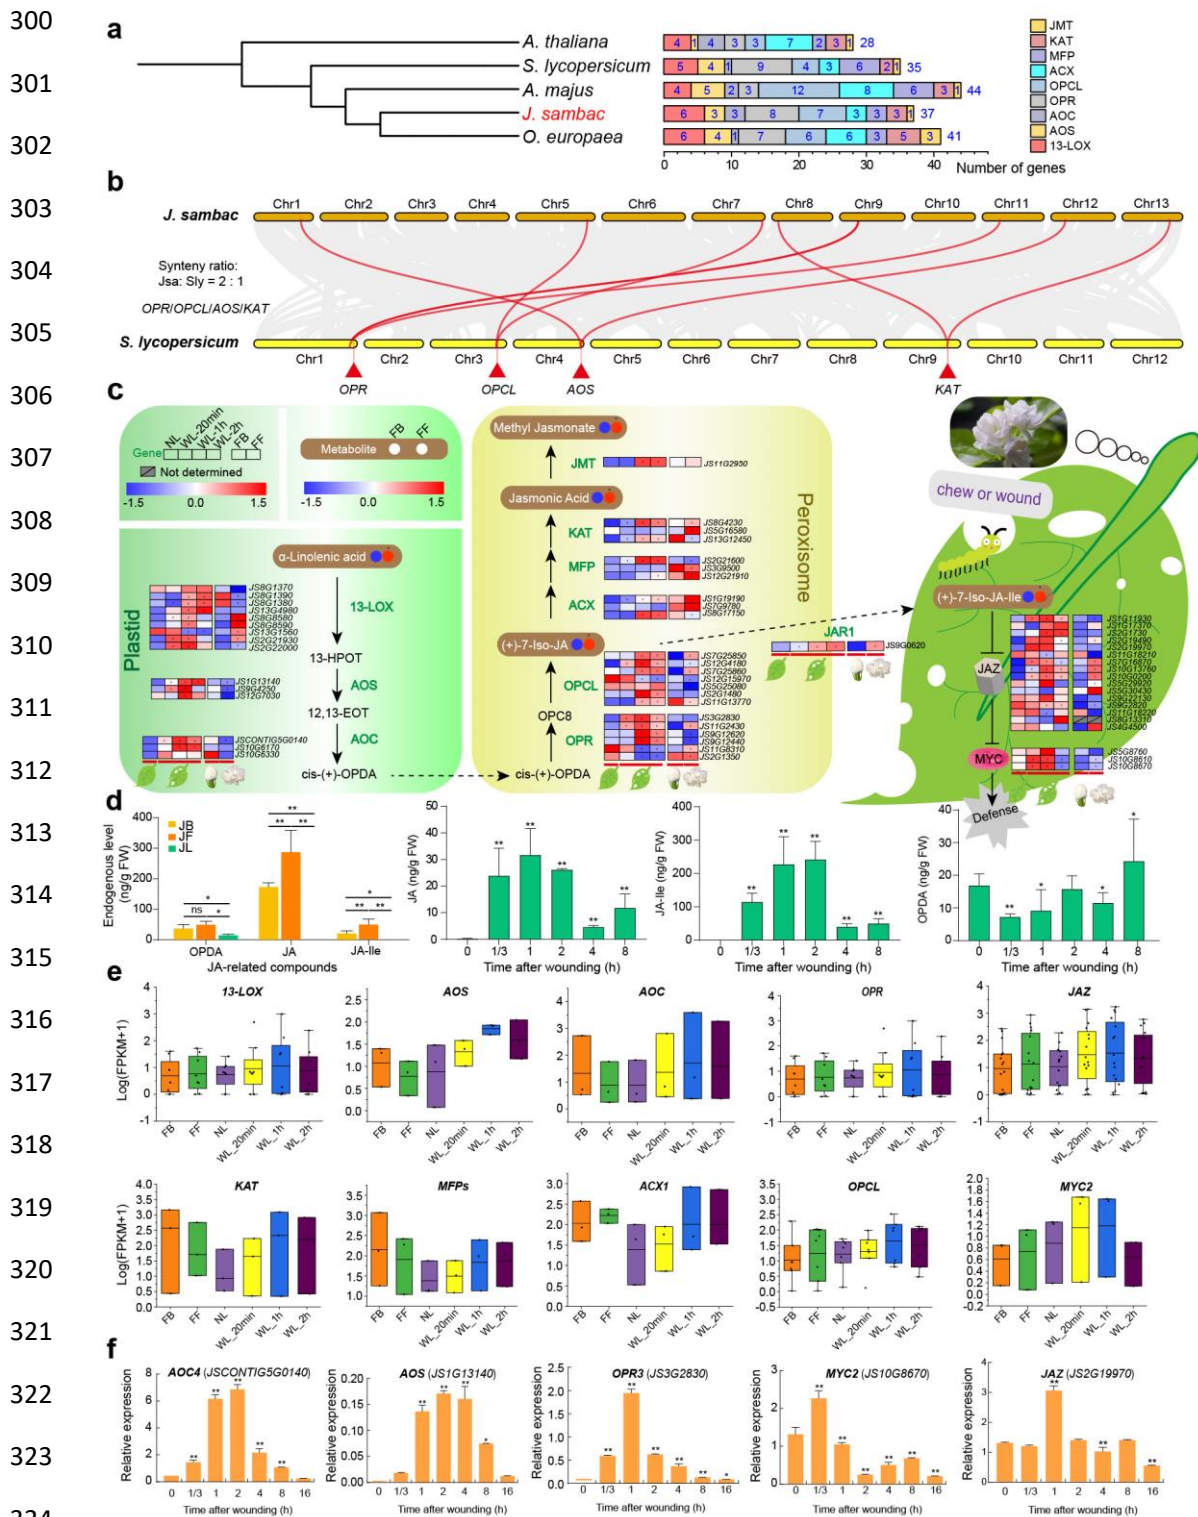

325 **Fig. 6 Jasmonate biosynthesis in *J. sambac*.** **a** Comparison of jasmonate biosynthesis genes in the genomes of *J.*  
 326 *sambac*, *A. thaliana*, *S. lycopersicum*, *A. majus*, and *O. europaea*. **b** Synteny analysis in genomes of *J. sambac* and  
 327 *S. lycopersicum*. **c** Jasmonate synthesis pathways in *J. sambac* normal leaves, wounded leaves, and flowers based

328 on transcriptomic and metabolomic analyses. **d** Contents of endogenous JA-related compounds in flowers and  
329 wounded leaves. **e** Transcriptomic analysis of genes involved in jasmonate biosynthesis and JA signal transduction  
330 in normal leaves, wounded leaves, and flowers. **f** qRT-PCR analysis of genes involved in jasmonate biosynthesis  
331 and JA signal transduction in leaves at different times after wounding. NL, normal leaves; WL, wounded leaves  
332 (followed by time after wounding); FB, flower buds; FF, full-bloom flowers.

## 333 **Discussion**

334 *J. sambac* is the world-famous flower that is widely used in ornamental horticulture, the  
335 perfume industry, scented tea, food, and pharmaceutical applications<sup>2,21,22</sup>. Despite its extensive  
336 use, the genome of *J. sambac* has not yet been sequenced. In this study, we used the cultivar  
337 ‘double petal’ (the most widely-cultivated *J. sambac*) as material for genome sequencing (Fig. 7a,  
338 b). We sequenced and assembled a high-quality chromosome-level genome of *J. sambac* by  
339 combining PacBio and Illumina with Hi-C sequencing. Our assembled genome is approximately  
340 550.12 Mb with a scaffold N50 size of 40.10 Mb; 97.36% of the genome is anchored onto 13  
341 pseudochromosomes. Furthermore, BUSCO evaluation revealed that the genome covers 91.7% of  
342 the complete single-copy orthologs of plant-specific sequences. These results indicate that our  
343 genome assembly is precise, complete, and of high quality. In addition, 30,129 genes were  
344 annotated by the combination of *de novo*, homology-based, and RNA sequencing (RNA-seq) data,  
345 93.2% of which had predicted functions, indicating a high annotation quality. This high-quality  
346 genome sequence of *J. sambac* provides a fundamental genetic resource for functional genomic  
347 research and understanding fragrance biosynthesis mechanisms in *J. sambac*.

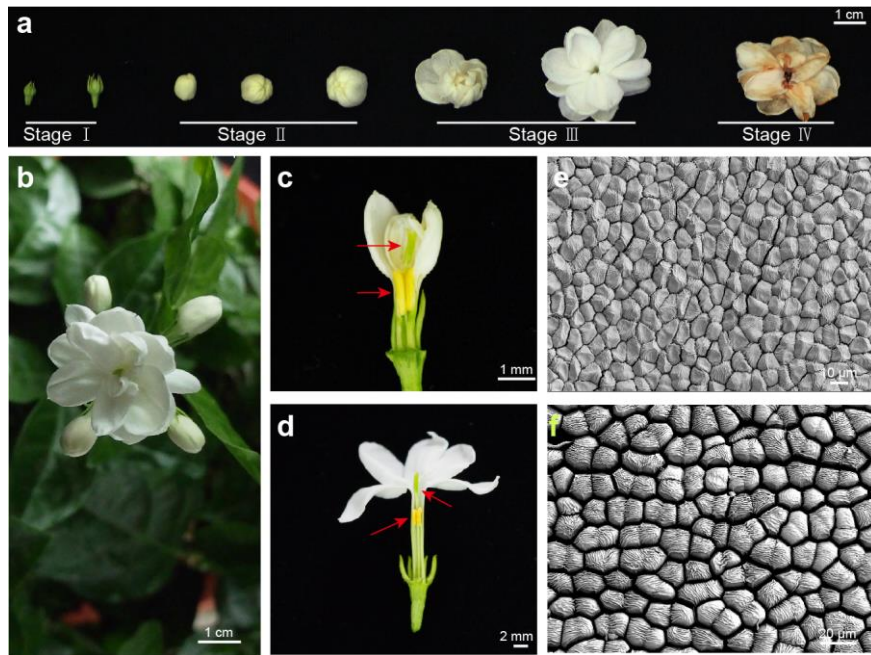

348

349 **Fig. 7 Morphology of *J. sambac* flowers.** **a** Different stages of *J. sambac* flowers. **b** The morphology of fully  
350 blooming flowers. **c, d** Anatomy of *J. sambac* flower bud and full-bloom flower. Red arrows indicate the pistil and  
351 stamens. **e, f** Morphology of the petal cells of a flower bud (**e**) and full-bloom flower (**f**) under scanning electron  
352 microscopy.

353

354 In the Oleaceae family, the genomes of five species have been sequenced, including *F.*  
355 *excelsior*<sup>23</sup>, *O. europaea*<sup>24</sup>, *O. oleaster*<sup>25</sup>, *O. fragrans*<sup>26</sup>, and *Forsythia suspensa*<sup>27</sup>. Among them,  
356 only *O. fragrans* flowers are scented with a sweet aroma, with VOCs including linalool,  
357 dihydrojasmone lactone, 1-cyclohexene-1-propanol, and  $\beta$ -ocimene<sup>28</sup>. By contrast, the aroma type  
358 of *J. sambac* flowers is significantly different. During the flowering period, as their petals fully  
359 expand, the corolla tube in FFs becomes markedly elongated compared to that in FBs (Fig. 7c, d),  
360 indicating that this developmental stage is for flower fragrance release. We identified the major  
361 volatile fragrances in *J. sambac* flowers as terpenoids (linalool,  $\gamma$ -muurolene, isodene,  
362 farnesene), phenylpropanoids/benzenoids (phenylacetaldehyde, 2-phenylethanol, BB, BA1c, BAC,  
363 MeSA), and fatty acids ( $\alpha$ -linolenic acid, JA, MeJA, JA-Ile) (Supplementary Tables S11, S13).  
364 These VOCs appear to make up the unique scent of *J. sambac* flowers. Generally, plant VOC  
365 biosynthesis is regulated by many genes and gene families<sup>20,29</sup>. For example, the terpenoids are  
366 biosynthesized via TPS-dependent pathways<sup>30</sup>. In the genome of *J. sambac*, we identified many  
367 TPS genes present as gene clusters through recent tandem duplications, resulting in significantly  
368 amplified TPS genes in the genome. Therefore, the terpenoid fragrance enriched in *J. sambac*



369 flowers is likely contributed by these TPS gene clusters. Moreover, the terpenoid fragrance that  
370 evaporates into the air differs significantly between FBs and FFs. This can be explained by the  
371 differential expression of TPS genes observed at the two stages. In addition, FF petal cells are  
372 plump, with larger intercellular spaces, compared to those in FBs (Fig. 7e, f), implying that the  
373 separated petal cells increase the emission of fragrant compounds in FFs. These morphological,  
374 transcriptional, and metabolomics analyses collectively imply that fragrance release from *J.*  
375 *sambac* flowers is a dynamic stage-dependent process. Notably, negative selection occurs in many  
376 TPS gene pairs in the *J. sambac* genome. Since *J. sambac* has already been cultivated for over  
377 1000 years<sup>31</sup>, this type of negative selection has largely resulted from long-term selection through  
378 artificial cultivation, especially by vegetative propagation in *J. sambac*.

379 Volatile phenylpropanoids and benzenoids are major volatile aromas present in plants<sup>10</sup>. They  
380 originate from the aromatic amino acid Phe. Several other antioxidant metabolites are also  
381 synthesized from Phe, including flavonoids and anthocyanin pigments<sup>32,33</sup>. Phe is deaminated to  
382 cinnamic acid (CA) by PAL. CA is further converted into diverse volatile compounds via three  
383 main synthetic routes of enzymatic and acid-catalyzed transformations: BB, catalyzed by  
384 cinnamate-coenzyme A ligase (CNL); Eug, catalyzed by EGS; and MB, SA, and MeSA, catalyzed  
385 by benzaldehyde dehydrogenase (BALDH). Phe can also be converted to PEB via PhA and PhEth,  
386 catalyzed by PAR and BPBT, respectively<sup>20</sup>. In our analysis, these phenylpropanoid/benzenoid  
387 volatile compounds, including BB, Eug, MB, MeSA, PhA, and PhEth (Supplementary Table S14),  
388 accumulated more in FFs than in FBs, whereas SA was detected at higher levels in FBs (Fig. 5a).  
389 Furthermore, many other metabolites in the phenylpropanoid/benzenoid pathways were also  
390 detected in our analysis, such as phenylpyruvic acid, ferulic acid, 2,3-dihydroxybenzoic acid, and  
391 benzoic acid. These volatile compounds also contribute to the specific aromas of *J. sambac*  
392 flowers. Expression analysis of the phenylpropanoid/benzenoid pathway genes by RNA-seq  
393 revealed that *PAL*, *AAAT*, *EGS*, *IGS*, and *SAMT* were highly expressed in FFs, whereas *BPBT* and  
394 *CNL* were more highly expressed in FBs. Apparently, the regulation of gene expression at varying  
395 stages coordinates VOC dynamics during the timeline of flower blooming. Notably, we identified  
396 many flavonoids (38 of 174) that were enriched in *J. sambac* flowers. As flavonoids are important  
397 secondary metabolites with antioxidant properties, and jasmine tea is a common beverage, the  
398 jasmine flowers in tea may be beneficial to human health in addition to providing aroma.

399 Another important type of fragrant VOCs in *J. sambac* flowers is fatty acids and their  
400 derivatives. Among them, jasmonate and its related compounds, including JA, MeJA, JA-Ile, and  
401 jasmone, are fragrant components of the essential oils of jasmine (*Jasminum*) flowers<sup>2,13</sup>. In our  
402 metabolomics analyses, these jasmonate-related compounds were enriched in *J. sambac* flowers,  
403 indicating their important roles in the formation of the characteristic aromatic odor of the flowers.  
404 In addition, JA, MeJA, and JA-Ile play important roles in plant defense against biotic and abiotic  
405 stresses<sup>18</sup>. Our analysis revealed that the JA contents and related genes in *J. sambac* leaves  
406 responded to mechanical injury. For example, several genes in the JA biosynthesis pathway were  
407 highly expressed in wounded leaves and the JA signal-transduction-related genes (*JAZ*, *MYC2*)  
408 were also activated after wounding. These results were further confirmed by qRT-PCR. Compared  
409 to *Arabidopsis* and tobacco<sup>34,35</sup>, the response times of genes involved in JA signaling and  
410 biosynthesis pathways to wounding are similar in leaves, implying a similar responsive pattern in  
411 *J. sambac*. However, in the JA signaling pathway, expression of some *JAZ* genes, such as  
412 *JS11G18210* and *JS11G18220*, was significantly higher in FBs, while that of other *JAZ* genes  
413 (*JS7G16870*, *JS10G13760*, *JS10G200*, *JS5G30430*, and *JS4G4500*) was higher in FFs, implying a  
414 significant difference in the function of the *JAZs* involved in the flower development of *J. sambac*.  
415 Moreover, *JAZs* and *MYCs* were significantly activated with the high JA content in FFs, implying  
416 that flowering is the important period for biosynthesis of jasmonates and JA-related floral aroma  
417 substances. These findings demonstrate that the regulation of the JA signaling pathway during *J.*  
418 *sambac* flower development is related to the robust secondary metabolism. In particular, MeJA has  
419 been reported to induce expression of terpenoid- and phenylpropanoid/benzenoid-related genes  
420 and promote the synthesis of related metabolites<sup>32,36</sup>. Therefore, these jasmonates in blooming *J.*  
421 *sambac* flowers may also affect the synthesis and release of other floral aromatic components. As  
422 an important aroma itself, MeJA together with other aromatic components may orchestrate the  
423 unique sweet fragrance of *J. sambac* flowers. However, other than attracting pollinators, the  
424 further biological significance of jasmonates in *J. sambac* flowers requires additional research.

425 In summary, we here present a chromosome-level genome of *J. sambac* and identify the main  
426 volatile aromas in *J. sambac* flower buds and blooming flowers. Our multi-omics analyses reveal  
427 the mechanisms of jasmine volatile aroma production (Fig. 8). This high-quality, annotated  
428 genome sequence of *J. sambac* together with the transcriptomic and metabolomic datasets in this



429 study provide a fundamental genetic resource for studying functional genomics and fragrance  
 430 biosynthesis in *J. sambac*, which will be invaluable for industrial exploitation of jasmine flowers  
 431 in the future.

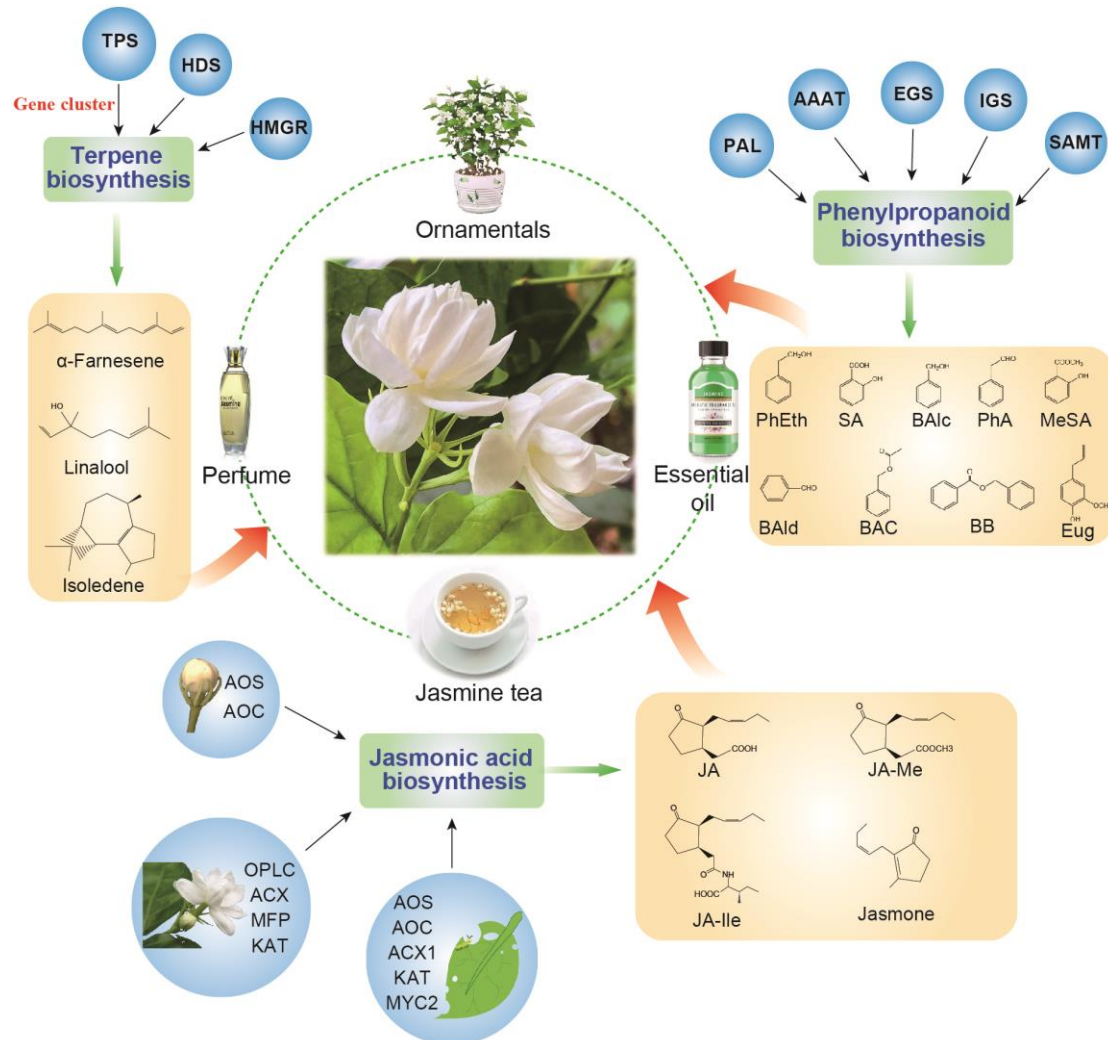

432  
 433 **Fig. 8 Schematic diagram summarizing the production of aromatic compounds in *J. sambac* flowers and**  
 434 **their contributions to commercial applications of *J. sambac*.**

435

## 436 **Materials and Methods**

### 437 *Plant materials for genome sequencing*

438 The *J. sambac* ‘double petal’ cultivar, the major cultivar in China, was selected as the model  
 439 plant species for studying jasmine flowers (Fig. 7). All the materials were sampled from individual  
 440 potted plant clones with the same genetic background in the greenhouse of Yangzhou University,  
 441 Yangzhou, China (32.39° N, 119.42° E). The newly expanded leaves from the sequenced plant

442 were disinfected with 70% ethyl alcohol and rinsed with distilled water. They were then harvested  
443 and immediately frozen in liquid nitrogen and stored at  $-80^{\circ}\text{C}$  prior to DNA extraction.

#### 444 ***Estimation of the genome size***

445 To estimate the *J. sambac* genome size, k-mer analysis with Illumina sequencing short reads  
446 was performed. A k-mer refers to an oligonucleotide of k bp in length. The k-mer frequencies  
447 derived from the sequencing reads follow a Poisson distribution in a given dataset (Supplementary  
448 Fig. S1). Given a certain k-mer, genome size can be simply inferred from the total number of  
449 k-mers (referred to as K\_num) divided by the k-mer depth: genome size = K\_num / k-mer\_depth.  
450 When the k-mer size was set to 17, the 89.05 Gb (sequencing depth of 162 $\times$ ) of sequencing reads  
451 from short-insert size libraries generated a total of 64,963,845,770 k-mers, and the k-mer depth  
452 was  $\sim 112\times$ . From these statistics, we estimated that the genome size of *J. sambac* was  $\sim 580.03$  Mb,  
453 and after removing the wrong k-mers, the revised genome size was  $\sim 573.02$  Mb.

#### 454 ***Library preparation and sequencing***

455 Genomic DNA was extracted by the CTAB method and at least 10  $\mu\text{g}$  of sheared DNA was  
456 obtained. SMRT bell template preparation, including DNA concentration, damage repair, end  
457 repair, ligation of hairpin adapters, and template purification, was conducted using AMPure PB  
458 Magnetic Beads (PacBio, Menlo Park, CA, USA). We conducted 20-kb single-molecule real-time  
459 DNA sequencing using PacBio to sequence a DNA library on the PacBio Sequel platform and  
460 63.90 Gb of raw sequencing reads were obtained. Reads were trimmed for adaptor removal and  
461 quality enhancement, yielding 63.82 Gb of PacBio data (read quality  $\geq 0.80$ , mean read length  $\geq$   
462 14 kb) representing 116 $\times$  genome coverage.

#### 463 ***De novo genome assembly***

464 Before *de novo* assembly, low-quality PacBio subreads with a read length  $< 500$  bp or a  
465 quality score  $< 0.8$  were filtered out. The remaining clean PacBio subreads were error-corrected  
466 and assembled into contigs using FALCON software. The assembled scaffolds were polished with  
467 Quiver ([http://pbsmrtpipe.readthedocs.io/en/master/getting\\_started.html](http://pbsmrtpipe.readthedocs.io/en/master/getting_started.html)) in two rounds. Finally,  
468 the polished sequences were further corrected with reference to the Illumina reads using Pilon  
469 (<https://github.com/broadinstitute/pilon/wiki>) in two rounds.

#### 470 ***Pseudochromosome validation using Hi-C***

471 To avoid artificial bias, the following reads were removed: reads with  $\geq 10\%$  unidentified

472 nucleotides (Ns); reads with > 10 bp aligned to the adapter, allowing  $\leq$  10% mismatches; reads  
473 with > 50% bases having a Phred quality < 5. The filtered Hi-C reads were aligned to the initial  
474 pseudochromosome genome using BWA (version 0.7.8) with default parameters. Reads were  
475 excluded from subsequent analysis if they did not align within 500 bp of a restriction site. Only  
476 paired-end reads that uniquely mapped with valid ditags were used to validate the  
477 pseudochromosome sequences. Juicebox (<https://github.com/aidenlab/Juicebox>) was used to  
478 manually order the scaffolds in each group to obtain the final pseudochromosome assembly.  
479 Contact maps were plotted using HiCPlotter. The high collinearity between the genetic map-based  
480 chromosome anchoring and Hi-C-based contact map information corroborated the overall  
481 assembly quality.

### 482 ***Assessment of J. sambac genome quality***

483 The completeness of the *J. sambac* assembly was evaluated by two methods. First, the 1440  
484 conserved protein models in the BUSCO “embryophyta\_odb9” dataset  
485 ([https://busco.ezlab.org/frame\\_wget.html](https://busco.ezlab.org/frame_wget.html)) were queried against the *J. sambac* genome using the  
486 BUSCO (Version 2) program with default settings (Supplementary Table S3); we obtained a  
487 genome completeness value of 91.7%.

### 488 ***Repeat annotation***

489 Repeat elements in the *J. sambac* genome were annotated using a combined strategy. Alignment  
490 searches were undertaken against the Repbase database (<http://www.girinst.org/repbase>), then  
491 RepeatProteinMask searches (<http://www.repeatmasker.org/>) were used for prediction of  
492 homologs<sup>37</sup>. For *de novo* annotation of repeat elements, LTR\_FINDER  
493 ([http://tlife.fudan.edu.cn/tlife/ltr\\_finder/](http://tlife.fudan.edu.cn/tlife/ltr_finder/)) Piler (<http://www.drive5.com/piler/>), RepeatScout  
494 (<http://www.repeatmasker.org/>), and RepeatModeler  
495 (<http://www.repeatmasker.org/RepeatModeler/>) were used to construct a *de novo* library, then  
496 annotation was carried out with RepeatMasker.

### 497 ***RNA-seq-based prediction for gene annotation***

498 To aid gene annotation and perform the transcriptome analysis, RNA was extracted from six  
499 tissues (roots, shoots, adult leaves, wounded leaves, buds, and full-bloom flowers) of *J. sambac*.  
500 All fresh tissues were first frozen in liquid nitrogen and stored at  $-80^{\circ}\text{C}$  before processing. Total  
501 RNA of each sample was extracted using TRIzol Reagent (Invitrogen, Carlsbad, CA, USA)

502 according to the manufacturer's instructions and mixed together. RNA-seq libraries were prepared  
503 using the Illumina standard mRNA-seq library preparation kit and sequenced on the Illumina  
504 HiSeq 4000 platform using a paired-end sequencing strategy. A full-length isoform sequencing  
505 (ISO-seq) library was also constructed with an insert size of 0–5 kb using the same samples, then  
506 sequenced on the PacBio SMRT Sequel platform at Novogene (Tianjin, China). The ISO-seq reads  
507 were extracted using the SMRTlink (<https://www.pacb.com/support/software-downloads/>)  
508 software to obtain the polished consensus sequences; these data were further processed by the  
509 CD-hit software to remove redundancies.

### 510 ***Annotation of protein-coding genes***

511 Protein-coding genes were annotated using a comprehensive strategy integrating results  
512 obtained from homology-based prediction, *de novo* prediction, and RNA-seq-based prediction  
513 methods. Annotated protein sequences from *F. excelsior*, *O. fragrans*, *O. europaea*, and *O.*  
514 *europaea* var. *sylvestris* (Oleaceae family) were aligned to the *J. sambac* genome assembly using  
515 WU-Blast with an E-value cutoff of  $1e^{-5}$  and the hits were conjoined using the Solar software.  
516 GeneWise was used to predict the exact gene structure of the corresponding genomic regions for  
517 each WU-Blast hit. The gene structure created by GeneWise was denoted as the homology-based  
518 prediction gene set (Homo-set). Gene models created by PASA were denoted as the PASA  
519 ISO-seq set (PASA-ISO-set) and were used as the training data for the *de novo* gene prediction  
520 programs. Five *de novo* gene-prediction programs (Augustus, GENSCAN, GeneID,  
521 GlimmerHMM, and SNAP) were used to predict coding regions in the repeat-masked genome.  
522 Illumina RNA-seq data were mapped to the assembly using TopHat, then Cufflinks was used to  
523 assemble the transcripts into gene models (Cufflinks-set). In addition, RNA-seq data were  
524 assembled by Trinity, creating several pseudo-expressed sequence tags (ESTs). These  
525 pseudo-ESTs were also mapped to the SCHZ assembly by LASTZ, and gene models were  
526 predicted using PASA. PacBio ISO-seq sequences were mapped directly to the *J. sambac* genome  
527 assembly by BLAT and assembled by PASA. This gene set was denoted as the PASA Trinity set  
528 (PASA-T-set). Gene model evidence data from the HOMO-set, PASA-ISO-set, Cufflinks-set,  
529 PASA-T-set, and *de novo* programs were combined by EvidenceModeler into a non-redundant set  
530 of gene annotations. Weights for each type of evidence were set as follows: PASA-ISO-set >  
531 HOMO-set > PASA-T-set > Cufflinks-set > Augustus > GeneID = SNAP = GlimmerHMM =

532 GENSCAN. Gene models with low confidence scores were filtered out by the following criteria:

533 (1) coding region lengths of 150 bp, (2) supported only by *de novo* methods and with FPKM<1.

534 All protein-coding genes were aligned to two integrated protein sequence databases: SwissProt  
535 and NR. Protein domains were annotated by searching against InterPro database (Version 32.0)  
536 using InterProScan and against the Pfam database (Version 27.0) using HMMER. The GO terms  
537 for each gene were obtained from the corresponding InterPro or Pfam entry. The pathways in  
538 which the genes might be involved were assigned by BLAST searches against the KEGG database,  
539 with an E-value cutoff of  $1e^{-5}$ . Functional annotation results from the three strategies above were  
540 finally merged. The annotation results can be found in Supplementary Table S5. In total, 30,129  
541 genes were predicted to be functional, accounting for 93.2% of all genes in the *J. sambac* genome  
542 (Supplementary Table S6).

#### 543 ***Annotation of non-coding RNAs***

544 Non-coding RNAs were annotated using tRNAscan-SE (<http://lowelab.ucsc.edu/tRNAscan-SE/>)  
545 (for tRNA) or INFERNAL (<http://infernal.janelia.org/>) (for miRNA and small nuclear RNA).  
546 Since rRNA sequences are highly conserved among plants, rRNA from *A. thaliana* was screened  
547 by Blast searches (Supplementary Table S7).

#### 548 ***Protein ortholog analysis***

549 Orthologous relationships between genes of *J. sambac*, *O. fragrans*, *F. excelsior*, *O. europaea*,  
550 *O. oleaster*, *Prunus mume*, *Petunia inflata*, *C. sinensis*, *Populus trichocarpa*, *S. lycopersicum*,  
551 *Vitis vinifera*, *Medicago truncatula*, *Oryza sativa*, *A. thaliana*, *A. majus*, *Amborella trichopoda*,  
552 and *Salvia splendens* were inferred through all-against-all protein sequence similarity searches  
553 using OrthoMCL (<http://orthomcl.org/orthomcl/>); only the longest predicted transcript per locus  
554 was retained.

#### 555 ***Protein phylogenetic analysis***

556 For each gene family, an alignment was produced using MUSCLE  
557 (<http://www.drive5.com/muscle/>), ambiguously aligned positions were trimmed using Gblocks  
558 (<http://molevol.cmima.csic.es/castresana/Gblocks.html>), and the tree was inferred using RAxML  
559 7.2.9 (<http://sco.h-its.org/exelixis/software.html>).

#### 560 ***Estimates of divergence times***

561 Divergence times between species were calculated using the MCMC tree program

562 (<http://abacus.gene.ucl.ac.uk/software/paml.html>) implemented in Phylogenetic Analysis by  
563 Maximum Likelihood (PAML).

#### 564 ***Expansion and contraction of gene families***

565 To identify gene family evolution as a stochastic birth and death process in which a gene  
566 family either expands or contracts per gene per million years independently along each branch of  
567 the phylogenetic tree, we used the likelihood model originally implemented in the software  
568 package Café (<http://sourceforge.net/projects/cafehahnlab/>). The phylogenetic tree topology and  
569 branch lengths were taken into account to infer the significance of changes in gene family size in  
570 each branch.

#### 571 ***WGD analysis***

572 We applied 4DTv and  $K_s$  estimation to detect WGD events. First, respective paralogs of *O.*  
573 *fragrans*, *Glycine max*, *O. europaea*, *V. vinifera*, and *A. thaliana* were identified with OrthoMCL.  
574 Then, the protein sequences of these plants were aligned against each other using Blastp (E-value  
575  $\leq 1e^{-5}$ ) to identify the conserved paralogs of each plant. Finally, the WGD events of each plant  
576 were evaluated based on their 4DTv distributions (Fig. 2d).

#### 577 ***Transcriptome analysis of different tissues***

578 The adult leaves were prodded with needles to simulate insect biting; 20 minutes after  
579 prodding, the wounded and normal leaves as well as FBs and FFs were collected and stored in  
580 liquid nitrogen, then transferred to a freezer at  $-80^{\circ}\text{C}$  before RNA extraction. Three biological  
581 replicates (each treatment and each tissue) were conducted. RNA-seq libraries were constructed  
582 according to the manufacturer's instructions and sequenced on the Illumina HiSeq 4000 platform  
583 at Novogene. The RNA-seq reads of each sample were mapped to the reference genome of *J.*  
584 *sambac* by HISAT2 with the parameter " --dta"; StringTie was further used to calculate the  
585 transcript per million (TPM) value for each gene with default parameters.

586 In addition, the extracted RNAs from wounded leaves, normal leaves, stems, roots, FBs, and  
587 FFs were mixed for RNA-seq and full-length transcriptome sequencing to assist with gene  
588 annotation.

#### 589 ***Detection of metabolites in FBs and FFs by ultra-performance (UP) LC-MS***

590 The FBs and FFs (Fig. 7a, stages II and III) were collected and stored in liquid nitrogen,  
591 then transferred to a freezer at  $-80^{\circ}\text{C}$ . The freeze-dried buds and flowers were crushed using a



592 mixer mill (MM 400, Retsch, Haan, Germany) with a zirconia bead for 1.5 min at 30 Hz. Powder  
593 (100 mg) was weighed and extracted overnight at 4°C with 0.6 mL 70% aqueous methanol.  
594 Following centrifugation at 10,000 g for 10 min, the extracts were absorbed (CNWBOND  
595 Carbon-GCB SPE Cartridge, 250 mg, 3 mL; ANPEL, Shanghai, China) and filtrated (SCAA-104,  
596 0.22 µm pore size; ANPEL) before UPLC-MS/MS analysis. Then, the sample extracts were  
597 analyzed using a UPLC–electrospray ionization (ESI)-MS/MS system (UPLC: Shim-pack UFLC  
598 CBM30A; Shimadzu, Kyoto, Japan; MS: QTRAP 4500; Applied Biosystems, Foster City, CA).

### 599 ***Detection of volatiles using gas chromatography (GC)-MS***

600 The buds and flowers stored at –80°C were ground to powder in liquid nitrogen. The powder  
601 (1 g) was immediately transferred to a 20-mL head-space vial (Agilent, Palo Alto, CA, USA)  
602 containing 2 mL NaCl-saturated solution to inhibit any enzyme reaction. The vials were sealed  
603 using crimp-top caps with TFE-silicone headspace septa (Agilent). At the time of solid phase  
604 microextraction analysis, each vial was incubated at 60°C for 10 min, then a 65-µm  
605 divinylbenzene/Carboxen/polydimethylsiloxane fiber (Supelco, Bellefonte, PA, USA) was  
606 exposed to the headspace of the sample for 20 min at 60°C. After sampling, desorption of the  
607 VOCs from the fiber coating was carried out in the injection port of the GC apparatus (Model  
608 7890B; Agilent) at 250°C for 5 min in splitless mode. The identification and quantification of  
609 VOCs was carried out using a 7890B GC and a 7000D mass spectrometer (Agilent) equipped with  
610 a 5% phenyl-polymethylsiloxane capillary column (DB-5MS, 30 m × 0.25 mm × 1.0 µm; Agilent).

### 611 ***Detection of volatiles actively released from flowers on living plants***

612 MonoTrap (DCC 18; Shimadzu) disks were used as absorbents for volatile collection. The  
613 overground parts of *J. sambac* plants were covered and fastened to a Teflon gas sampling bag (5  
614 L), with MonoTrap disks hanging on branches next to blooming flowers (Supplementary Fig. S9).

615 After 6 h of absorption, all MonoTrap disks were collected in sealed bottles (one disk per  
616 bottle). The disks were crushed under liquid nitrogen, then carbon disulfide was used to elute and  
617 collect absorbed volatiles. Then, the Exactive GC Orbitrap GC-MS system (Thermo Fisher  
618 Scientific, Waltham, MA, USA) coupled with a Tace1310 GC was used for metabolite analysis.

619 Extracts were liquid injected and separated by a DB-5 column using the following GC  
620 program: start at 40°C, hold for 5 min, then increase temperature to 280°C at a rate of 5°C/min.  
621 The scan range of 33–550 m/z was acquired with data dependent MS/MS acquisition with 60,000

622 resolution under full scan mode. The source parameters were as follows: ion source temperature:  
623 280°C; MS transfer line: 250°C.

624 MS/MS data were analyzed using TraceFinder analysis software (Thermo Fisher Scientific).  
625 Data processing parameter settings were as follows: minimum peak width = 10 s, maximum peak  
626 width = 60 s, mzwid = 0.015, minfrac = 0.5, bw = 5, and signal/noise threshold = 5.

627 Metabolites were identified and characterized based on high-resolution MS-associated  
628 methods using TraceFinder. First, the candidate chemical formulas of metabolites were identified  
629 using the accurate high-resolution m/z values and MS/MS fragment patterns, with a mass accuracy  
630 of 3 ppm based on NIST MS Search. Then, the MS/MS spectra were analyzed by manually  
631 comparing both fragment patterns and isotope ratios to identify the metabolites. Peak detection,  
632 retention time correction, and chromatogram alignment were performed. The results contained a  
633 peak list with metabolite names, retention times, m/z values, and the mean ion abundance with  
634 standard deviation.

### 635 ***Plant hormone extraction***

636 Flower and leaf samples were collected and immediately stored in liquid nitrogen. Then,  
637 metabolites of samples were extracted using a modified Wolfender method. First, 100 mg of  
638 flower powder obtained by crushing under liquid nitrogen was weighed and transferred to a 2-mL  
639 centrifuge tube with 10 µL internal standards (10 µg/mL d5-JA). Second, 1.5 mL extraction buffer  
640 (isopropanol:formic acid = 99.5:0.5, v/v) was added followed by vortexing to resuspend samples.  
641 After 15 min centrifugation at 14,000 g, the supernatants were dried in a Labconco CentriVap  
642 vacuum centrifugal concentrator and resuspended with 1 mL methanol solvent (85:15, v/v). Then,  
643 a C18 SPE tube (Sep-pak C18 SPE Cartridge, 100 mg, 1 mL; Waters Technology, Shanghai, China)  
644 was used for sample purification, and a total of 1.5 mL eluent was collected for each sample.  
645 Finally, the eluents were dried in a Labconco CentriVap vacuum centrifugal concentrator and  
646 resuspended with 100 µL methanol solvent (60:40, v/v).

### 647 ***LC-MS for plant hormones***

648 Positive/negative ionization mode data were acquired using an Acquity UPLC I-Class  
649 (Waters Technology) coupled to a 4500 QTRAP triple quadrupole mass spectrometer (AB SCIEX,  
650 Ontario, CA) equipped with a 50 × 2.1 mm, 1.7 µm Acquity UPLC BEH C18 column (Waters  
651 Technology); 10-µL samples were loaded each time, and then eluted at a flow rate of 200 µL/min

652 with initial conditions of 50% mobile phase A (0.1% formic acid in acetonitrile) and 50% mobile  
653 phase B (0.1% formic acid in water) followed by a 10-min linear gradient to 100% mobile phase A.  
654 The auto-sampler was set at 10°C.

655 Mass spectrometry was operated separately in positive/negative ESI mode. The [M+H] or  
656 [M-H] of the analyte was selected as the precursor ion; precursor ion/product ion details for  
657 quantitation under multiple reaction monitoring mode are shown in Supplementary Table S15. The  
658 temperature of the ESI ion source was set to 500°C. Curtain gas flow was set to 25 psi,  
659 collisionally activated dissociation gas was set to medium, and the ionspray voltage was (+)5500  
660 V for positive ionization mode and (-)4500 for negative ionization mode with ion gases 1 and 2  
661 set to 50 psi. Data acquisition and processing were performed using AB SCIEX Analyst version  
662 1.6.3 (Applied Biosystems)

663

## 664 **References**

- 665 1. Hongratanaworakit, T. Stimulating effect of aromatherapy massage with jasmine oil. *Natural*  
666 *Product Communications*. 2010, 5(1), 157–162.
- 667 2. Al-Snafi, A. E. Pharmacological and therapeutic effects of *Jasminum sambac* - a review. *Indo*  
668 *American Journal Pharmaceutical Sciences*. 2018, 5,1766–1778.
- 669 3. Ito, Y., Sugmoto, A., Kakuda, T., Kubota, K. Identification of potent odorants in Chinese  
670 jasmine green tea scented with flowers of *Jasminum sambac*. *Journal of Agricultural and Food*  
671 *Chemistry*. 2002, 50, 4878–4884.
- 672 4. Shen, J. X., Rana, M. M., Liu, G. F., Ling, T. J., Gruber, M. Y., & Wei, S. Differential  
673 contribution of jasmine floral volatiles to the aroma of scented green tea. *Journal of Food*  
674 *Quality*. 2017, 2017, 5849501.
- 675 5. Sanchez, F. C. Jr., Santiago, D., Khe, C. P. Production management practices of Jasmine  
676 (*Jasminum sambac* [L.] aiton) in the Philippines. *The International Society for Southeast*  
677 *Asian Agricultural Sciences*. 2010, 16(2), 126–136.
- 678 6. Adnan, N., and Othman, N. The relationship between plants and the Malay culture.  
679 *Procedia-Social and Behavioral Sciences*. 2012, 42, 231–241.
- 680 7. Zhang, M., and Guo, F. Literature review on the localization of Jasmine. *Agricultural*

- 681 Archaeology. 2018, (1): 166–170.
- 682 8. Schiestl, F. P. The evolution of floral scent and insect chemical communication. Ecology  
683 Letters. 2010, 13, 643–656.
- 684 9. Delle-Vedove, R., Schatz, B., & Dufay, M. Understanding intraspecific variation of floral  
685 scent in light of evolutionary ecology. Annals of Botany. 2017, 120, 1–20.
- 686 10. Bera, P., Mukherjee, C., Mitra, A. Enzymatic production and emission of floral scent volatiles  
687 in *Jasminum sambac*. Plant Science. 2017, 256, 25–38.
- 688 11. Braun, N. A., & Sim, S. *Jasminum sambac* flower absolutes from India and China—Geographic  
689 variations. Natural Product Communications. 2012, 7(5), 645–650.
- 690 12. Zhou, H. C., Hou, Z. W., Wang, D. X., Ning, J. M., Wei, S. Large scale preparation, stress  
691 analysis, and storage of headspace volatile condensates from *Jasminum sambac* flowers. Food  
692 Chemistry. 2019, 286, 170–178.
- 693 13. Issa, M. Y., Mohsen, E., Younis, I. Y., Nofal, E. S., Farag, M. A. Volatiles distribution in  
694 jasmine flowers taxa grown in Egypt and its commercial products as analyzed via solid-phase  
695 microextraction (SPME) coupled to chemometrics. Industrial Crops and Products. 2020, 144,  
696 112002.
- 697 14. Yu, Y., Lyu, S., Chen, D., Lin, Y., Chen, J., Chen, G., & Ye, N. Volatiles emitted at different  
698 flowering stages of *Jasminum sambac* & expression of genes related to  $\alpha$ -farnesene  
699 biosynthesis. Molecules. 2017, 22(4), 1–13.
- 700 15. Liu, X., Liu, Y., Huang, P., Ma, Y., Qing, Z., Tang, Q., et al. The Genome of medicinal plant  
701 *Macleaya cordata* provides new insights into benzyloquinoline alkaloids metabolism.  
702 Molecular Plant. 2017, 10(7), 975–989.
- 703 16. Mochida, K., Sakurai, T., Seki, H., Yoshida, T., Takahagi, K., Sawai, S., et al. Draft genome  
704 assembly and annotation of *Glycyrrhiza uralensis*, a medicinal legume. Plant Journal. 2017,  
705 89(2), 181–194.
- 706 17. Zhao, Q., Yang, J., Cui, M. Y., Liu, J., Fang, Y., Yan, M., et al. The reference genome sequence  
707 of *Scutellaria baicalensis* provides insights into the evolution of wogonin biosynthesis.  
708 Molecular Plant. 2019, 12, 935–950.
- 709 18. Howe, G. A., Major, I. T., Koo, A. J. Modularity in jasmonate signaling for multistress  
710 resilience. Annual Review of Plant Biology. 2018, 69, 387–415.

- 711 19. Simão, F. A., Waterhouse, R. M., Ioannidis, P., Kriventseva, E. V., Zdobnov, E. M. BUSCO:  
712 Assessing genome assembly and annotation completeness with single-copy orthologs.  
713 Bioinformatics. 2015, 31, 3210–3212.
- 714 20. Muhlemann, J. K., Klempien, A., Dudareva, N. Floral volatiles: from biosynthesis to function.  
715 Plant Cell and Environment. 2014, 37, 1936–1949.
- 716 21. Bhattacharjee, S. K. Native jasmine of India. Indian Perfumer. 1980, 24, 113–126.
- 717 22. Ho, C.C., Ng, S.C., Chuang, H.L., Wen, S.Y., Kuo, C.H., Mahalakshmi, B., et al. Extracts of  
718 *Jasminum sambac* flowers fermented by *Lactobacillus rhamnosus* inhibit H<sub>2</sub>O<sub>2</sub>- and  
719 UVB-induced aging in human dermal fibroblasts. Environmental Toxicology. 2020, e23065.
- 720 23. Sollars, E. S. A., Harper, A. L., Kelly, L. J., Sambles, C. M., Ramirez-Gonzalez, R. H.,  
721 Swarbreck, D., et al. Genome sequence and genetic diversity of European ash trees. Nature.  
722 2017, 541, 212–216.
- 723 24. Cruz, F., Julca, I., Gómez-Garrido, J., Loska, D., Marcet-Houben, M., Cano, E., et al. Genome  
724 sequence of the olive tree, *Olea europaea*. GigaScience. 2016, 5, 29.
- 725 25. Unver, T., Wu, Z., Sterck, L., Turktas, M., Lohaus, R., Li, Z., et al. Genome of wild olive and  
726 the evolution of oil biosynthesis. Proceedings of the National Academy of Sciences of the  
727 United States of America. 2017, 114, 9413–9422.
- 728 26. Yang, X., Yue, Y., Li, H., Ding, W., Chen, G., Shi, T., et al. The chromosome-level quality  
729 genome provides insights into the evolution of the biosynthesis genes for aroma compounds  
730 of *Osmanthus fragrans*. Horticulture Research. 2018, 5, 72.
- 731 27. Li, L., Cushman, S.A., He, Y., Li, Y. Genome sequencing and population genomics modeling  
732 provide insights into the local adaptation of weeping forsythia. Horticulture Research. 2020,  
733 7, 130.
- 734 28. Xin, H., Wu, B., Zhang, H., Wang, C., Li, J., Yang, B, et al. Characterization of volatile  
735 compounds in flowers from four groups of sweet osmanthus (*Osmanthus fragrans*) cultivars.  
736 Canadian Journal of Plant Science. 2013, 93, 923–931.
- 737 29. Ramya, M., An, H. R., Baek, Y. S., Reddy, K. E., Park, P. H. Orchid floral volatiles:  
738 Biosynthesis genes and transcriptional regulations. Scientia Horticulturae. 2018, 235, 62–69.
- 739 30. Karunanithi P. S. & Zerbe P. Terpene synthases as metabolic gatekeepers in the evolution of  
740 plant terpenoid chemical diversity. Frontiers in Plant Science. 2019, 10, 1166.

- 741 31. Sabharwal, S., Sudan, S., Ranjan, V. *Jasminum sambac* Linn (Motia): A review. International  
742 Journal of Pharmaceutical Research and Bio-science. 2013, 2, 108–130.
- 743 32. Vogt, T. Phenylpropanoid Biosynthesis. *Molecular Plant*. 2010, 3, 2–20.
- 744 33. Dudareva, N., Klempien, A., Muhlemann, J. K., and Kaplan, I. Biosynthesis, function and  
745 metabolic engineering of plant volatile organic compounds. *New Phytologist*. 2013, 198, 16–  
746 32.
- 747 34. Baldwin, I.T., Zhang, Z.P., Diab, N., Ohnmeiss, T.E., McCloud, E.S., et al. Quantification,  
748 correlations and manipulations of wound-induced changes in jasmonic acid and nicotine in  
749 *Nicotiana sylvestris*. *Planta*. 1997, 201, 397–404.
- 750 35. Glauser, G., Grata, E., Dubugnon, L., Rudaz, S., Farmer, E. E., Wolfender, J.L. Spatial and  
751 temporal dynamics of jasmonate synthesis and accumulation in *Arabidopsis* in response to  
752 wounding. *Journal of Biological Chemistry*. 2008, 283, 16400–16407.
- 753 36. Wasternack, C. and Strnad, M. Jasmonates are signals in the biosynthesis of secondary  
754 metabolites – Pathways, transcription factors and applied aspects – A brief review. *New*  
755 *Biotechnology*. 2019, 48, 1–11.
- 756 37. Jurka, J., Kapitonov, V. V., Pavlicek, A., Klonowski, P., Kohany, O., Walichiewicz, J. Repbase  
757 Update, a database of eukaryotic repetitive elements. *Cytogenetic and Genome*  
758 *Research*. 2005, 110, 462–467.

759

#### 760 **Data availability**

761 The genome assemblies, gene annotations, and Illumina re-sequencing short reads have been  
762 deposited in the Genome Sequence Archive (GSA) and Genome Warehouse database in the BIG  
763 Data Center (<https://bigd.big.ac.cn/gsa/>) under BioProject Accession number GSA:  
764 PRJCA003967.

765

#### 766 **Acknowledgements**

767 We thank Novogene for genome sequencing and assembly. We thank Dr. Feng Cheng for his  
768 comments on our manuscript. This work was self-funded.

769

#### 770 **Author notes**



771 These author contributed equally: Gang Chen, Salma Mostafa, Zhaogeng Lu, Ran Du.

772

### 773 **Contributions**

774 B.J., J.Y, and G.C. conceived and designed the study; G.C., S.M., Z.L., R.D., J.C., Y.W., Q.L.,  
775 J.L., X.M., B.C., L.W., and Z.J. performed the experiments; G.C., S.M., Z.L., R.D., J.C., Y.W.,  
776 Q.L., J.L., X.M., B.C., L.W., Z.J., X.Y., and Y.Z. analysed the data; B.J., J.Y, and G.C. wrote the  
777 manuscript; All authors read and approved the final draft.

778

### 779 **Corresponding authors**

780 Correspondence to Biao Jin or Jianbin Yan.

781

### 782 **Ethics declarations**

783 Not applicable.

784

### 785 **Competing interests**

786 The authors declare no competing interests.

787

### 788 **Additional information**

#### 789 **Supplementary Figures:**

790 Supplementary Fig. S1. Evaluation of the genome size of *J. sambac* by 17-mer analyses.

791 Supplementary Fig. S2. Hi-C interaction heatmap of *J. sambac* reference genome showing  
792 interactions between the 13 chromosomes.

793 Supplementary Fig. S3. Divergence distribution of transposable elements in the genome of *J.*  
794 *sambac*.

795 Supplementary Fig. S4. Different elements of annotated genes in *J. sambac* genome.

796 Supplementary Fig. S5. Summary of protein-coding genes in *J. sambac* genome predicted from *de*  
797 *novo*, homology-based, and RNA-seq approaches.

798 Supplementary Fig. S6. Functional annotation of genes in *J. sambac* genome.

799 Supplementary Fig. S7. KEGG enrichment results of the *J. sambac* specific gene families.

800 Supplementary Fig. S8. KEGG enrichment of different expressed genes in flower buds and  
801 full-blown flowers (a) and synteny analysis in genomes of *J. sambac* and *S. lycopersicum* (b).

802 Supplementary Fig. S9. Volatiles collection with MonoTrap® DCC 18.

803

804 **Supplementary Tables:**

805 Supplementary Table S1 Genome assembly using both PacBio reads and Hi-C data.

806 Supplementary Table S2 Distribution of chromosomes in the assembled genome of *J. sambac*.

807 Supplementary Table S3 Quality assessment of the assembled genome of *J. sambac* using  
808 BUSCOs.

809 Supplementary Table S4 Summary statistics of the annotated transposable elements (TEs) in the *J.*  
810 *sambac* genome.

811 Supplementary Table S5 Summary statistic of annotated genes in *J. sambac* genome. Genes were  
812 annotated by the combination of *de novo*, homology-based, and RNA-seq data.

813 Supplementary Table S6 Summary statistics of the functional genes of *J. sambac*.

814 Supplementary Table S7 Annotated non-coding RNA in *J. sambac* genome.

815 Supplementary Table S8 Functional annotation of the genes in *J. sambac*.

816 Supplementary Table S9 TPS genes containing at least one conserved domain in the genome of *J.*  
817 *sambac*.

818 Supplementary Table S10 Volatile metabolites in flower buds and full-bloom flowers in *J. sambac*.

819 Supplementary Table S11 GC-MS results in flower buds and full-bloom flowers in *J. sambac*.

820 Supplementary Table S12 Differential abundant terpene metabolites identified between the flower  
821 buds and full-bloom flowers in *J. sambac*.

822 Supplementary Table S13 Widely-targeted metabolomics in flower buds and full-bloom flowers in  
823 *J. sambac*.

824 Supplementary Table S14 Differential abundant phenylpropanoid/benzenoid metabolites  
825 identified between the flower buds and full-bloom flowers in *J. sambac*.

826 Supplementary Table S15 The collision energies for different MRM pairs.
